# Supplementary material for: Label-free fluorescent detection of Cu(ii) ions based on DNA cleavage-dependent graphene-quenched DNAzymes
Source: Royal Society of Chemistry journal article supplement (doi:10.1039/c1cc12006a), 2011-01-01
Supplement: c1cc12006a.pdf [file c1cc12006a.pdf]

1 Supplementary Material for Chemical Communications  
2 This journal is © The Royal Society of Chemistry 2011

### 4 **Supplementary Data**

## 6 **Label-Free Fluorescent Detection of Cu(II) Ions Based on the** 7 **DNA Cleavage-Dependent Graphene-Quenched DNazymes**

8 **Meng Liu, Huimin Zhao,\* Shuo Chen, Hongtao Yu, Yaobin Zhang and Xie Quan\***

### 10 **Reagents and Instruments**

11  
12 Cu(II)-dependent DNazymes (Cu-Sub: 5'-T<sub>10</sub>AGCTTCTTTCTAATACGGCTTACC-3' and Cu-Enz:  
13 5'-GGTAAGCCTGGGCCTTTCTTTTAAGAAAGAAC-3') were purchased from Takara Biotechnology Co.  
14 (Dalian, China) purified by high-performance liquid chromatography (HPLC). GelRed (10000×) in water was  
15 purchased from Biotium. NaCl, CuCl<sub>2</sub>, BaCl<sub>2</sub>, CaCl<sub>2</sub>, CdCl<sub>2</sub>, FeCl<sub>3</sub>, MnCl<sub>2</sub>, Pb(NO<sub>3</sub>)<sub>2</sub> and ZnCl<sub>2</sub> were of analytical  
16 reagent grade and purchased from the Kemiou Agent Co., Tianjin (China). Other reagents such as HCl, HNO<sub>3</sub>, and  
17 H<sub>2</sub>O<sub>2</sub> (30%) and anhydrous ethanol were used as received without any treatment. Sodium ascorbate was obtained from  
18 Sinopharm Chemical Reagent Co., Ltd (China). Ultrapure water obtained from a Millipore water purification system  
19 (resistivity > 18.0 MΩ cm<sup>-1</sup>, Laikie Instrument Co., Ltd, Shanghai, China) was used throughout the experiments.  
20 Phosphate buffer solution (PBS, 20 mM) with pH 7.4 was prepared by mixing the stock solution of Na<sub>2</sub>HPO<sub>4</sub> and  
21 NaH<sub>2</sub>PO<sub>4</sub>. FL measurements were performed using a Hitachi F-4500 spectrofluorimeter with a scan rate at 2400  
22 nm/min. The excitation wavelength was at 530 nm. The slits for excitation and emission were set at 5 nm/10 nm.

### 24 **Preparation of Graphene Oxide and Graphene**

25  
26 Graphene oxide was prepared by our reported method.<sup>1</sup> An environment-friendly hydrothermal route was employed to  
27 convert graphene oxide to graphene. The resultant solution of graphene (0.1 mg/mL) was stored at room temperature  
28 and employed in the following experiments.

### 30 **Preparation of DNazymes**

31  
32 In brief, 1.8 μM Cu-Sub and 1.8 μM Cu-Enz were firstly mixed in a buffer (pH 7.4) containing 20 mM PBS, 0.5 M  
33 NaCl. Then the mixture was warmed to 95 °C for 2 min in a water bath and subsequently allowed to cool naturally to  
34 room temperature (25 °C). The obtained DNazymes were stored at 4 °C.

### 36 **Fluorescent Assay for Cu(II)**

37  
38 In a typical experiment, 200 μL of GelRed (100×) and 800 μL of DNazymes were incubated for 20 min at 25 °C. The  
39 final concentration of Cu(II)-dependent DNazymes was 1.45 μM. Subsequently, 340 μL of PBS buffer (20 mM, 50  
40 mM NaCl, pH 7.4), 20 μL of DNazymes-GelRed, 120 μL of graphene solution (0.1 mg/mL) were sequentially added  
41 into a microcentrifuge tube. After 15 min reaction, the solution was transferred to a quartz cell. Finally, 10 μL of  
42 ascorbate (10 mM) and 10 μL of different concentrations of Cu(II) were added for time-dependent FL measurement at  
43  $\lambda_{\text{ex}}/\lambda_{\text{em}} = 530/613$  nm. The final volume of the solution was fixed at 500 μL. The control experiment was carried out  
44 under the same condition without the addition of Cu(II).

1 **Figures**

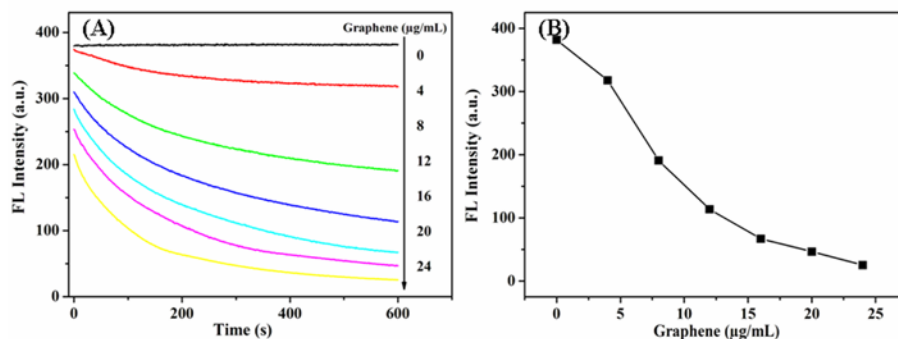

16 Fig. S1 (A) Kinetics study for the FL changes of the DNAzymes-GelRed complex with different concentrations of graphene.  
17 (B) FL changes of DNAzymes-GelRed complex as a function of graphene with a series of concentrations. Experimental  
18 conditions: 20 mM PBS, 50 mM NaCl, pH 7.4, 58 nM DNAzymes, GelRed (20 $\times$ ), reaction time: 10 min (25  $^{\circ}$ C), excitation  
19 wavelength: 530 nm, emission wavelength: 613 nm.  
20

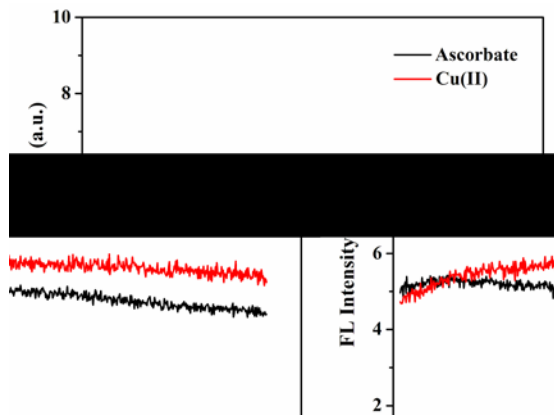

37 Fig. S2 Kinetics study for FL changes of the label-free graphene-quenched DNAzymes in the absence of Cu(II) or ascorbate.  
38 Experimental conditions: 20 mM PBS, 50 mM NaCl, pH 7.4, 58 nM DNAzymes, 24  $\mu$ g/mL graphene, GelRed (20 $\times$ ), 0.2 mM  
39 ascorbate or 0.5 mM Cu(II), reaction time: 10 min (25  $^{\circ}$ C), excitation wavelength: 530 nm, emission wavelength: 613 nm.  
40

41  
42  
43  
44  
45  
46  
47  
48  
49  
50  
51  
52 **Reference**

53 1 M. Liu, H. M. Zhao, X. Quan, S. Chen and X. F. Fan, *Chem. Commun.*, 2010, **46**, 7909-7911.  
54
